# Supplementary material for: Development and calibration of an oil spill behavior model. Final report
Source: Royal Society of Chemistry journal article supplement (doi:10.1039/c2nr33269h), 1982-09-01
Supplement: c2nr33269h.pdf [file c2nr33269h.pdf]

# The Monolithic Lawn-like CuO-based Nanorods Array Used for Diesel Soot Combustion under Gravitational Contact Mode

Yifu Yu, Ming Meng\* and Fangfang Dai

Tianjin Key Laboratory of Applied Catalysis Science & Engineering, School of Chemical Engineering & Technology, Tianjin University, Tianjin 300072 (P. R. China)

E-mail: mengm@tju.edu.cn

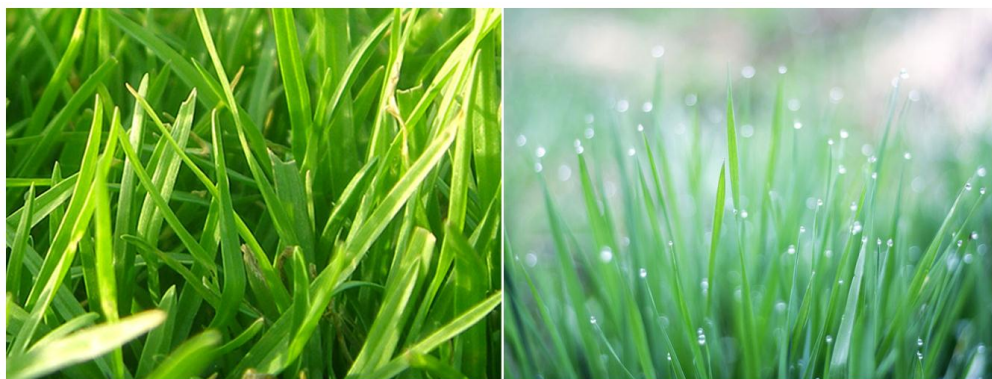

**Figure S1.** The photograph images of dry lawn (left) and wet lawn (right). It is clearly seen that some raindrops are attached to the surface of blades, which is the **mimic** target in this work.

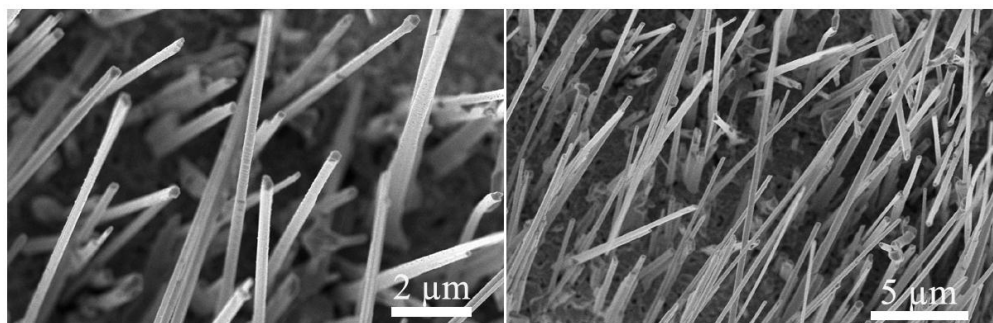

**Figure S2.** SEM images of CuO nanorods array after used for soot combustion. The lawn-like nanorods array structure is still retained, indicating its high **thermal-stable potential**.
